# Supplementary material for: Discovery of Core Biotic Stress Responsive Genes in Arabidopsis by Weighted Gene Co-Expression Network Analysis
Source: PubMed Central journal article supplement (PMC4346582; doi:10.1371/journal.pone.0118731), 2015-03-02

**A****Scale independence**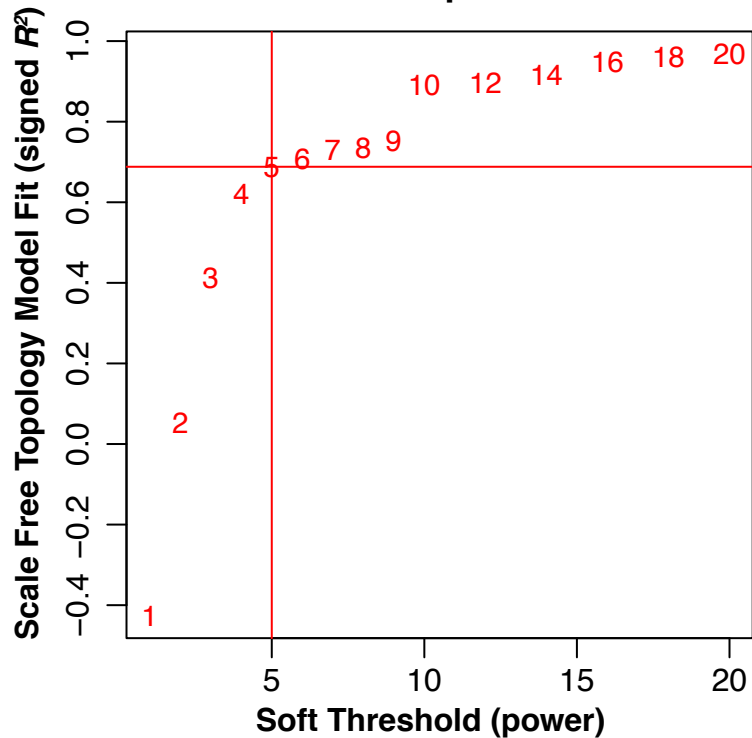**B****Mean connectivity**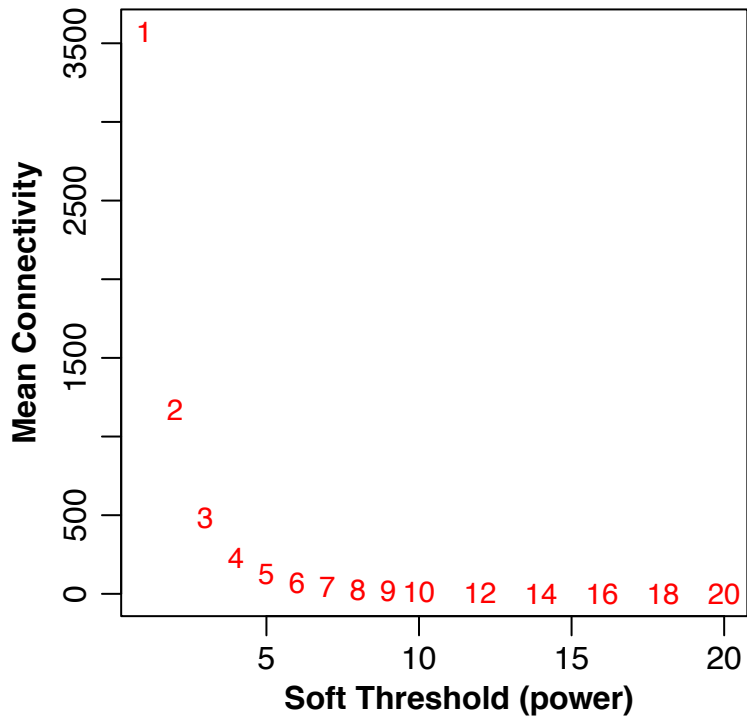

Supplement: pone.0118731.s002.pdf [file pone.0118731.s002.pdf]
