# Supplementary material for: Discovery of Core Biotic Stress Responsive Genes in Arabidopsis by Weighted Gene Co-Expression Network Analysis
Source: PLoS One. 2015 Mar 2;10(3):e0118731. doi: 10.1371/journal.pone.0118731 (PMC4346582; doi:10.1371/journal.pone.0118731)
Supplement: S8 Table — (XLSX) [file pone.0118731.s013.xlsx]

## Sheet: table_S8
Table S8. Detailed topGO Hub node and meta-module Gene ontology enrichment
HUB GENES																					TOOL Meta-module													LTDL Meta-module													LT meta-module
BP-46 hubs	Annotation	Annotated	Significant	Expected	p.value	NO MF		BP-66 hubs	Annotation	Annotated	Significant	Expected	p.value	MF-66 hubs	Annotation	Annotated	Significant	Expected	p.value		BP-TOOL	Annotation	Annotated	Significant	Expected	p.value	MF	Annotation	Annotated	Significant	Expected	p.value		BP-LTDL	Annotation	Annotated	Significant	Expected	p.value	MF-LTDL	Annotation	Annotated	Significant	Expected	p.value		BP-LT	Annotation	Annotated
GO:0000165	MAPK cascade	222	6	0.62	3.41529e-05			GO:0000165	MAPK cascade	222	7	0.88	2.69832e-05	GO:0004364	glutathione transferase activity	42	2	0.15	0.0095953		GO:0010200	response to chitin	408	73	3.75	3.18495e-77	GO:0043167	ion binding	4099	56	35.34	7.76421e-05		GO:0009723	response to ethylene stimulus	337	41	2.83	2.05876e-36	GO:0048037	cofactor binding	421	14	3.6	1.52008e-05		GO:0006820	anion transport	563
GO:0002252	immune effector process	274	5	0.77	0.000980125			GO:0002252	immune effector process	274	6	1.09	0.000742458	GO:0016301	kinase activity	1075	10	3.79	0.00395355		GO:0010243	response to organic nitrogen	422	73	3.88	4.45331e-76	GO:0000166	nucleotide binding	2748	39	23.69	0.000771629		GO:0009719	response to endogenous stimulus	1625	66	13.67	2.6449e-30	GO:0016829	lyase activity	270	11	2.31	2.07436e-05		GO:0006865	amino acid transport	252
GO:0002376	immune system process	969	22	2.72	1.49067e-15			GO:0002376	immune system process	969	27	3.84	7.81907e-17	GO:0016772	transferase activity, transferring phosphorus-containing groups	1256	11	4.43	0.00391875		GO:0002376	immune system process	969	85	8.92	1.47914e-64	GO:0043168	anion binding	2249	35	19.39	0.000286906		GO:0010033	response to organic substance	2509	77	21.1	3.31681e-28	GO:0003824	catalytic activity	6650	81	56.91	2.21817e-05		GO:0071705	nitrogen compound transport	683
GO:0002679	respiratory burst involved in defense re...	121	5	0.34	2.15916e-05			GO:0002679	respiratory burst involved in defense re...	121	6	0.48	8.21609e-06	GO:0016773	phosphotransferase activity, alcohol group as acceptor	1005	9	3.54	0.00805483		GO:0030968	endoplasmic reticulum unfolded protein r...	180	50	1.66	8.01189e-62	GO:0017076	purine nucleotide binding	1918	33	16.54	6.74698e-05		GO:0042221	response to chemical stimulus	3424	83	28.79	8.10217e-24	GO:0004364	glutathione transferase activity	42	5	0.36	2.81301e-05		GO:0009753	response to jasmonic acid stimulus	462
GO:0002682	regulation of immune system process	421	15	1.18	2.65332e-13			GO:0002682	regulation of immune system process	421	20	1.67	9.57206e-17	GO:1901505	carbohydrate derivative transporter activity	33	2	0.12	0.00600455		GO:0006986	response to unfolded protein	182	50	1.67	1.50774e-61	GO:0001883	purine nucleoside binding	1910	32	16.47	0.000148165		GO:0009725	response to hormone stimulus	1422	54	11.96	1.15511e-22	GO:0008762	UDP-N-acetylmuramate dehydrogenase activity	29	4	0.25	0.000103243		GO:0009611	response to wounding	331
GO:0006082	organic acid metabolic process	1817	14	5.09	0.000307635			GO:0002831	regulation of response to biotic stimulu...	29	2	0.11	0.00585441								GO:0034620	cellular response to unfolded protein	182	50	1.67	1.50774e-61	GO:0032550	purine ribonucleoside binding	1910	32	16.47	0.000148165		GO:0050896	response to stimulus	5893	103	49.56	1.5178e-20	GO:0016491	oxidoreductase activity	1257	23	10.76	0.000403213		GO:0015849	organic acid transport	274
GO:0006605	protein targeting	887	14	2.49	7.77671e-08			GO:0006082	organic acid metabolic process	1817	19	7.2	5.14349e-05								GO:0035967	cellular response to topologically incor...	182	50	1.67	1.50774e-61	GO:0032555	purine ribonucleotide binding	1911	32	16.48	0.00014962		GO:0006952	defense response	1486	50	12.5	1.4537e-18	GO:0009055	electron carrier activity	378	11	3.24	0.000408178		GO:0046942	carboxylic acid transport	274
GO:0006612	protein targeting to membrane	383	14	1.07	1.369e-12			GO:0006605	protein targeting	887	21	3.51	1.22109e-11								GO:0006984	ER-nucleus signaling pathway	188	50	1.73	9.5699e-61	GO:0032549	ribonucleoside binding	1916	32	16.52	0.000157086		GO:0006950	response to stress	3627	76	30.5	2.95742e-17	GO:0019825	oxygen binding	159	7	1.36	0.00043644		GO:0008219	cell death	485
GO:0006810	transport	3008	18	8.43	0.000765258			GO:0006612	protein targeting to membrane	383	19	1.52	2.92286e-16								GO:0006952	defense response	1486	94	13.67	7.33934e-60	GO:0001882	nucleoside binding	1917	32	16.53	0.000158619		GO:0010200	response to chitin	408	27	3.43	5.87361e-17	GO:0005506	iron ion binding	267	9	2.29	0.000487525		GO:0016265	death	485
GO:0006862	nucleotide transport	53	2	0.15	0.00967332			GO:0006810	transport	3008	27	11.91	1.14369e-05								GO:1901698	response to nitrogen compound	753	73	6.93	4.11377e-57	GO:0032553	ribonucleotide binding	1936	32	16.69	0.000190433		GO:0010243	response to organic nitrogen	422	27	3.55	1.37034e-16	GO:0050660	flavin adenine dinucleotide binding	126	6	1.08	0.000748102		GO:0015711	organic anion transport	287
GO:0006886	intracellular protein transport	1001	14	2.81	3.44039e-07			GO:0006865	amino acid transport	252	5	1	0.00320319								GO:0031347	regulation of defense response	535	65	4.92	1.64101e-56	GO:0032559	adenyl ribonucleotide binding	1702	30	14.67	0.00010204		GO:1901700	response to oxygen-containing compound	2228	56	18.74	3.20525e-15	GO:0030170	pyridoxal phosphate binding	87	5	0.74	0.000898441		GO:0060548	negative regulation of cell death	174
GO:0006944	cellular membrane fusion	240	6	0.67	5.27755e-05			GO:0006886	intracellular protein transport	1001	21	3.96	1.16918e-10								GO:0080134	regulation of response to stress	554	65	5.1	1.656e-55	GO:0030554	adenyl nucleotide binding	1705	30	14.7	0.000105344		GO:0009607	response to biotic stimulus	1350	43	11.35	5.96622e-15	GO:0016830	carbon-carbon lyase activity	89	5	0.76	0.00099562		GO:0012501	programmed cell death	442
GO:0006950	response to stress	3627	38	10.17	4.02664e-18			GO:0006944	cellular membrane fusion	240	6	0.95	0.000369324								GO:0045087	innate immune response	852	74	7.84	1.69663e-54	GO:0035639	purine ribonucleoside triphosphate binding	1794	29	15.47	0.000589574		GO:0051707	response to other organism	1349	42	11.34	3.00462e-14	GO:0050662	coenzyme binding	305	9	2.61	0.00125133		GO:0052545	callose localization	92
GO:0006952	defense response	1486	28	4.17	2.75676e-18			GO:0006950	response to stress	3627	48	14.37	8.30281e-19								GO:0006955	immune response	859	74	7.9	3.08741e-54	GO:0005524	ATP binding	1585	27	13.66	0.000420684		GO:0002376	immune system process	969	35	8.15	1.03568e-13	GO:0016765	transferase activity, transferring alkyl or aryl (other than methyl) groups	97	5	0.83	0.00146399		GO:0033037	polysaccharide localization	93
GO:0006955	immune response	859	20	2.41	2.95694e-14			GO:0006952	defense response	1486	36	5.89	3.50372e-21								GO:0071310	cellular response to organic substance	1124	80	10.34	6.64126e-53	GO:0016772	transferase activity, transferring phosphorus-containing groups	1256	25	10.83	6.49115e-05		GO:0051704	multi-organism process	1572	44	13.22	2.57616e-13	GO:0005372	water transmembrane transporter activity	28	3	0.24	0.00171743		GO:1901700	response to oxygen-containing compound	2228
GO:0006972	hyperosmotic response	249	4	0.7	0.00512386			GO:0006955	immune response	859	25	3.4	5.88308e-16								GO:0009719	response to endogenous stimulus	1625	90	14.95	1.26056e-51	GO:0016773	phosphotransferase activity, alcohol group as acceptor	1005	24	8.66	4.77009e-06		GO:0033554	cellular response to stress	1352	40	11.37	7.77746e-13	GO:0015250	water channel activity	28	3	0.24	0.00171743		GO:0052542	defense response by callose deposition	63
GO:0006979	response to oxidative stress	578	7	1.62	0.00105183			GO:0006972	hyperosmotic response	249	6	0.99	0.00044907								GO:0010941	regulation of cell death	400	56	3.68	1.44882e-51	GO:0016301	kinase activity	1075	24	9.27	1.47818e-05		GO:0070887	cellular response to chemical stimulus	1299	38	10.92	4.87662e-12	GO:0020037	heme binding	262	8	2.24	0.00188055		GO:0010941	regulation of cell death	400
GO:0006984	ER-nucleus signaling pathway	188	13	0.53	2.81994e-15			GO:0006979	response to oxidative stress	578	8	2.29	0.0019454								GO:0034976	response to endoplasmic reticulum stress	348	53	3.2	1.2432e-50	GO:0004672	protein kinase activity	875	23	7.54	1.5651e-06		GO:0009620	response to fungus	478	23	4.02	1.16504e-11	GO:0016616	oxidoreductase activity, acting on the CH-OH group of donors, NAD or NADP as acceptor	160	6	1.37	0.00254299		GO:0043069	negative regulation of programmed cell d...	170
GO:0006986	response to unfolded protein	182	13	0.51	1.8442e-15			GO:0006984	ER-nucleus signaling pathway	188	16	0.74	1.83283e-17								GO:0043067	regulation of programmed cell death	393	55	3.62	1.43219e-50	GO:0004674	protein serine/threonine kinase activity	751	21	6.47	1.7923e-06		GO:0016053	organic acid biosynthetic process	1089	34	9.16	1.48795e-11	GO:0016740	transferase activity	2375	33	20.33	0.00276552		GO:0010363	regulation of plant-type hypersensitive ...	372
GO:0007154	cell communication	2044	24	5.73	8.57741e-11			GO:0006986	response to unfolded protein	182	16	0.72	1.08506e-17								GO:0010363	regulation of plant-type hypersensitive ...	372	54	3.42	1.77711e-50	GO:0005509	calcium ion binding	205	9	1.77	7.16087e-05		GO:0046394	carboxylic acid biosynthetic process	1089	34	9.16	1.48795e-11	GO:0016833	oxo-acid-lyase activity	10	2	0.09	0.003128		GO:0006944	cellular membrane fusion	240
GO:0007165	signal transduction	1675	22	4.7	9.62737e-11			GO:0007154	cell communication	2044	34	8.1	9.14379e-15								GO:0070887	cellular response to chemical stimulus	1299	82	11.95	2.29258e-50	GO:0004871	signal transducer activity	192	8	1.66	0.000259938		GO:1901698	response to nitrogen compound	753	28	6.33	2.42828e-11	GO:0046906	tetrapyrrole binding	290	8	2.48	0.00351107		GO:0061025	membrane fusion	240
GO:0007243	intracellular protein kinase cascade	223	6	0.63	3.50237e-05			GO:0007165	signal transduction	1675	32	6.63	1.82237e-15								GO:0002682	regulation of immune system process	421	56	3.87	2.7793e-50	GO:0060089	molecular transducer activity	192	8	1.66	0.000259938		GO:1901701	cellular response to oxygen-containing c...	882	30	7.42	3.78357e-11	GO:0008422	beta-glucosidase activity	12	2	0.1	0.00453658		GO:0080135	regulation of cellular response to stres...	382
GO:0008104	protein localization	1155	15	3.24	3.02055e-07			GO:0007243	intracellular protein kinase cascade	223	7	0.88	2.77715e-05								GO:0009626	plant-type hypersensitive response	400	55	3.68	3.9033e-50	GO:0015662	ATPase activity, coupled to transmembrane movement of ions, phosphorylative mechanism	39	5	0.34	2.01353e-05		GO:0044711	single-organism biosynthetic process	1713	42	14.41	8.03433e-11	GO:0043167	ion binding	4099	49	35.08	0.0051571		GO:0048583	regulation of response to stimulus	720
GO:0008219	cell death	485	14	1.36	3.24885e-11			GO:0008104	protein localization	1155	22	4.57	2.35656e-10								GO:0034050	host programmed cell death induced by sy...	401	55	3.69	4.49716e-50	GO:0042625	ATPase activity, coupled to transmembrane movement of ions	69	5	0.59	0.000319577		GO:0045087	innate immune response	852	29	7.16	8.393e-11	GO:0016614	oxidoreductase activity, acting on CH-OH group of donors	185	6	1.58	0.00517945		GO:0035556	intracellular signal transduction	549
GO:0009404	toxin metabolic process	204	6	0.57	2.12244e-05			GO:0008219	cell death	485	19	1.92	2.16424e-14								GO:0010033	response to organic substance	2509	104	23.09	4.59191e-50	GO:0019199	transmembrane receptor protein kinase activity	17	3	0.15	0.00039016		GO:0006955	immune response	859	29	7.22	1.01913e-10	GO:0016705	oxidoreductase activity, acting on paired donors, with incorporation or reduction of molecular oxygen	311	8	2.66	0.00532971		GO:0043067	regulation of programmed cell death	393
GO:0009407	toxin catabolic process	204	6	0.57	2.12244e-05			GO:0009404	toxin metabolic process	204	7	0.81	1.56518e-05								GO:0080135	regulation of cellular response to stres...	382	54	3.52	7.84043e-50	GO:1901265	nucleoside phosphate binding	2748	39	23.69	0.000771629		GO:0052542	defense response by callose deposition	63	10	0.53	1.11323e-10	GO:0016831	carboxy-lyase activity	48	3	0.41	0.00800756		GO:0042221	response to chemical stimulus	3424
GO:0009414	response to water deprivation	396	7	1.11	0.000107383			GO:0009407	toxin catabolic process	204	7	0.81	1.56518e-05								GO:0006612	protein targeting to membrane	383	54	3.52	9.07314e-50	GO:0036094	small molecule binding	2800	39	24.14	0.00111469		GO:0051716	cellular response to stimulus	2727	54	22.93	1.99917e-10	GO:0016847	1-aminocyclopropane-1-carboxylate synthase activity	16	2	0.14	0.00806577		GO:0009626	plant-type hypersensitive response	400
GO:0009415	response to water stimulus	402	7	1.13	0.000117905			GO:0009414	response to water deprivation	396	9	1.57	2.45305e-05								GO:0007165	signal transduction	1675	89	15.41	2.28325e-49	GO:0005484	SNAP receptor activity	26	3	0.22	0.00140953		GO:0080134	regulation of response to stress	554	23	4.66	2.21286e-10								GO:0034050	host programmed cell death induced by sy...	401
GO:0009607	response to biotic stimulus	1350	18	3.78	8.07696e-09			GO:0009415	response to water stimulus	402	9	1.59	2.76057e-05								GO:0043069	negative regulation of programmed cell d...	170	42	1.56	3.36876e-49	GO:0042626	ATPase activity, coupled to transmembrane movement of substances	147	6	1.27	0.00172235		GO:0009867	jasmonic acid mediated signaling pathway	283	17	2.38	2.41602e-10								GO:0045088	regulation of innate immune response	416
GO:0009611	response to wounding	331	8	0.93	3.36919e-06			GO:0009607	response to biotic stimulus	1350	25	5.35	1.59049e-11								GO:0045088	regulation of innate immune response	416	55	3.83	3.59257e-49	GO:0043492	ATPase activity, coupled to movement of substances	147	6	1.27	0.00172235		GO:0071395	cellular response to jasmonic acid stimu...	283	17	2.38	2.41602e-10								GO:0050776	regulation of immune response	418
GO:0009620	response to fungus	478	13	1.34	3.91207e-10			GO:0009611	response to wounding	331	10	1.31	6.51636e-07								GO:0051707	response to other organism	1349	82	12.41	4.46815e-49	GO:0004683	calmodulin-dependent protein kinase activity	28	3	0.24	0.00175381		GO:0042435	indole-containing compound biosynthetic ...	124	12	1.04	5.50638e-10								GO:0002682	regulation of immune system process	421
GO:0009626	plant-type hypersensitive response	400	14	1.12	2.46171e-12			GO:0009620	response to fungus	478	17	1.89	3.03831e-12								GO:0012501	programmed cell death	442	56	4.07	4.54014e-49	GO:0016820	hydrolase activity, acting on acid anhydrides, catalyzing transmembrane movement of substances	148	6	1.28	0.00178264		GO:0031347	regulation of defense response	535	22	4.5	6.84102e-10								GO:0010268	brassinosteroid homeostasis	5
GO:0009627	systemic acquired resistance	445	11	1.25	2.9228e-08			GO:0009626	plant-type hypersensitive response	400	19	1.58	6.49517e-16								GO:0050776	regulation of immune response	418	55	3.85	4.70948e-49	GO:0004702	receptor signaling protein serine/threonine kinase activity	29	3	0.25	0.00194392		GO:0043067	regulation of programmed cell death	393	19	3.3	7.85528e-10								GO:0048448	stamen morphogenesis	5
GO:0009628	response to abiotic stimulus	2574	14	7.22	0.00885597			GO:0009627	systemic acquired resistance	445	12	1.76	1.49409e-07								GO:0009607	response to biotic stimulus	1350	82	12.42	4.73561e-49	GO:0005057	receptor signaling protein activity	29	3	0.25	0.00194392		GO:0009755	hormone-mediated signaling pathway	702	25	5.9	8.19097e-10								GO:0009805	coumarin biosynthetic process	55
GO:0009692	ethylene metabolic process	111	3	0.31	0.00370088			GO:0009628	response to abiotic stimulus	2574	20	10.2	0.00169354								GO:0060548	negative regulation of cell death	174	42	1.6	1.00182e-48	GO:0004012	phospholipid-translocating ATPase activity	10	2	0.09	0.00317327		GO:0010941	regulation of cell death	400	19	3.36	1.05417e-09								GO:0051179	localization	3261
GO:0009693	ethylene biosynthetic process	111	3	0.31	0.00370088			GO:0009651	response to salt stress	750	8	2.97	0.00926638								GO:0008219	cell death	485	57	4.46	4.03292e-48	GO:0043169	cation binding	2100	30	18.1	0.0033326		GO:0035556	intracellular signal transduction	549	22	4.62	1.10812e-09								GO:0009804	coumarin metabolic process	56
GO:0009696	salicylic acid metabolic process	222	10	0.62	4.46599e-10			GO:0009692	ethylene metabolic process	111	5	0.44	7.73395e-05								GO:0016265	death	485	57	4.46	4.03292e-48	GO:0005488	binding	7751	83	66.82	0.00349856		GO:0044710	single-organism metabolic process	4377	70	36.81	1.37353e-09								GO:0006952	defense response	1486
GO:0009697	salicylic acid biosynthetic process	209	10	0.59	2.47501e-10			GO:0009693	ethylene biosynthetic process	111	5	0.44	7.73395e-05								GO:0048583	regulation of response to stimulus	720	65	6.63	4.30362e-48	GO:0004675	transmembrane receptor protein serine/threonine kinase activity	11	2	0.09	0.00385659		GO:0042430	indole-containing compound metabolic pro...	135	12	1.14	1.47841e-09								GO:1901701	cellular response to oxygen-containing c...	882
GO:0009719	response to endogenous stimulus	1625	24	4.56	6.14223e-13			GO:0009694	jasmonic acid metabolic process	154	4	0.61	0.00323931								GO:0044700	single organism signaling	1737	89	15.98	4.88324e-48	GO:0005388	calcium-transporting ATPase activity	12	2	0.1	0.00460186		GO:0032870	cellular response to hormone stimulus	730	25	6.14	1.82671e-09								GO:0048658	tapetal layer development	6
GO:0009723	response to ethylene stimulus	337	7	0.94	3.89139e-05			GO:0009695	jasmonic acid biosynthetic process	131	4	0.52	0.00180243								GO:0023052	signaling	1738	89	15.99	5.12534e-48	GO:0005515	protein binding	2158	30	18.6	0.00497827		GO:0009753	response to jasmonic acid stimulus	462	20	3.89	1.84048e-09								GO:0055088	lipid homeostasis	6
GO:0009725	response to hormone stimulus	1422	15	3.99	4.19686e-06			GO:0009696	salicylic acid metabolic process	222	11	0.88	1.02245e-09								GO:0035966	response to topologically incorrect prot...	359	50	3.3	1.35841e-45	GO:0046872	metal ion binding	1976	28	17.04	0.00521706		GO:0045088	regulation of innate immune response	416	19	3.5	2.01881e-09								GO:0031347	regulation of defense response	535
GO:0009737	response to abscisic acid stimulus	570	7	1.6	0.000969735			GO:0009697	salicylic acid biosynthetic process	209	11	0.83	5.39062e-10								GO:0051704	multi-organism process	1572	83	14.47	5.45387e-45	GO:0015075	ion transmembrane transporter activity	518	11	4.47	0.00523152		GO:0071495	cellular response to endogenous stimulus	735	25	6.18	2.09935e-09								GO:0071702	organic substance transport	1646
GO:0009738	abscisic acid mediated signaling pathway	238	6	0.67	5.0375e-05			GO:0009719	response to endogenous stimulus	1625	33	6.44	8.17563e-17								GO:0006950	response to stress	3627	114	33.37	1.52365e-44	GO:0015405	P-P-bond-hydrolysis-driven transmembrane transporter activity	196	6	1.69	0.00706283		GO:0050776	regulation of immune response	418	19	3.52	2.18499e-09								GO:0051234	establishment of localization	3085
GO:0009751	response to salicylic acid stimulus	458	14	1.28	1.51505e-11			GO:0009723	response to ethylene stimulus	337	10	1.33	7.67479e-07								GO:1901700	response to oxygen-containing compound	2228	94	20.5	3.90902e-44	GO:0005548	phospholipid transporter activity	15	2	0.13	0.00719834		GO:0010363	regulation of plant-type hypersensitive ...	372	18	3.13	2.24728e-09								GO:0006612	protein targeting to membrane	383
GO:0009753	response to jasmonic acid stimulus	462	11	1.3	4.28725e-08			GO:0009725	response to hormone stimulus	1422	23	5.63	2.00063e-09								GO:0009696	salicylic acid metabolic process	222	42	2.04	7.08983e-44	GO:0015399	primary active transmembrane transporter activity	197	6	1.7	0.00723435		GO:0002682	regulation of immune system process	421	19	3.54	2.45815e-09								GO:0006950	response to stress	3627
GO:0009755	hormone-mediated signaling pathway	702	11	1.97	2.75244e-06			GO:0009737	response to abscisic acid stimulus	570	13	2.26	2.92431e-07								GO:0009697	salicylic acid biosynthetic process	209	41	1.92	1.69919e-43	GO:1901363	heterocyclic compound binding	4918	56	42.4	0.00853954		GO:0080135	regulation of cellular response to stres...	382	18	3.21	3.41378e-09								GO:0080134	regulation of response to stress	554
GO:0009814	defense response, incompatible interacti...	533	12	1.49	1.73181e-08			GO:0009738	abscisic acid mediated signaling pathway	238	11	0.94	2.13013e-09								GO:0009620	response to fungus	478	53	4.4	3.74348e-43	GO:0097159	organic cyclic compound binding	4931	56	42.51	0.00904781		GO:0006612	protein targeting to membrane	383	18	3.22	3.55696e-09								GO:0014070	response to organic cyclic compound	835
GO:0009862	systemic acquired resistance, salicylic ...	251	5	0.7	0.000660979			GO:0009751	response to salicylic acid stimulus	458	19	1.81	7.68119e-15								GO:0033554	cellular response to stress	1352	76	12.44	2.48986e-42	GO:0004888	transmembrane signaling receptor activity	50	3	0.43	0.00914327		GO:0044283	small molecule biosynthetic process	1565	37	13.16	4.19631e-09								GO:0010033	response to organic substance	2509
GO:0009863	salicylic acid mediated signaling pathwa...	351	14	0.98	4.18847e-13			GO:0009753	response to jasmonic acid stimulus	462	16	1.83	2.19666e-11								GO:0007154	cell communication	2044	89	18.81	3.70164e-42								GO:0008219	cell death	485	20	4.08	4.2233e-09								GO:0006810	transport	3008
GO:0009867	jasmonic acid mediated signaling pathway	283	10	0.79	4.68068e-09			GO:0009755	hormone-mediated signaling pathway	702	17	2.78	1.21129e-09								GO:0042537	benzene-containing compound metabolic pr...	259	42	2.38	6.7461e-41								GO:0016265	death	485	20	4.08	4.2233e-09								GO:0032318	regulation of Ras GTPase activity	31
GO:0009987	cellular process	11046	39	30.96	0.00627411			GO:0009814	defense response, incompatible interacti...	533	13	2.11	1.35313e-07								GO:0042221	response to chemical stimulus	3424	107	31.51	5.23629e-40								GO:0052545	callose localization	92	10	0.77	5.10934e-09								GO:0033124	regulation of GTP catabolic process	32
GO:0010033	response to organic substance	2509	33	7.03	1.31626e-17			GO:0009862	systemic acquired resistance, salicylic ...	251	6	0.99	0.000468491								GO:0031348	negative regulation of defense response	277	42	2.55	1.28158e-39								GO:0012501	programmed cell death	442	19	3.72	5.45484e-09								GO:0043087	regulation of GTPase activity	32
GO:0010035	response to inorganic substance	1323	10	3.71	0.00312262			GO:0009863	salicylic acid mediated signaling pathwa...	351	19	1.39	5.82562e-17								GO:0051716	cellular response to stimulus	2727	97	25.09	1.89087e-39								GO:0033037	polysaccharide localization	93	10	0.78	5.68433e-09								GO:0030811	regulation of nucleotide catabolic proce...	33
GO:0010193	response to ozone	35	2	0.1	0.00431247			GO:0009867	jasmonic acid mediated signaling pathway	283	12	1.12	9.79007e-10								GO:0009814	defense response, incompatible interacti...	533	52	4.9	2.08821e-39								GO:0009617	response to bacterium	548	21	4.61	6.08542e-09								GO:0033121	regulation of purine nucleotide cataboli...	33
GO:0010200	response to chitin	408	14	1.14	3.21488e-12			GO:0009987	cellular process	11046	56	43.75	0.000455476								GO:0050832	defense response to fungus	334	44	3.07	8.43497e-39								GO:0072330	monocarboxylic acid biosynthetic process	606	22	5.1	6.8194e-09								GO:0006140	regulation of nucleotide metabolic proce...	34
GO:0010243	response to organic nitrogen	422	14	1.18	5.06147e-12			GO:0010033	response to organic substance	2509	43	9.94	2.28421e-20								GO:0009863	salicylic acid mediated signaling pathwa...	351	44	3.23	7.79383e-38								GO:0048583	regulation of response to stimulus	720	24	6.05	6.84399e-09								GO:0009118	regulation of nucleoside metabolic proce...	34
GO:0010363	regulation of plant-type hypersensitive ...	372	14	1.04	9.22492e-13			GO:0010035	response to inorganic substance	1323	14	5.24	0.000561186								GO:0071446	cellular response to salicylic acid stim...	353	44	3.25	1.00436e-37								GO:0009626	plant-type hypersensitive response	400	18	3.36	7.01634e-09								GO:1900542	regulation of purine nucleotide metaboli...	34
GO:0010583	response to cyclopentenone	146	5	0.41	5.31866e-05			GO:0010193	response to ozone	35	2	0.14	0.00844988								GO:0009627	systemic acquired resistance	445	47	4.09	5.20672e-37								GO:0034050	host programmed cell death induced by sy...	401	18	3.37	7.29444e-09								GO:0007265	Ras protein signal transduction	36
GO:0010941	regulation of cell death	400	14	1.12	2.46171e-12			GO:0010200	response to chitin	408	16	1.62	3.38959e-12								GO:0009751	response to salicylic acid stimulus	458	47	4.21	1.99718e-36								GO:0009850	auxin metabolic process	126	11	1.06	8.87626e-09								GO:0046578	regulation of Ras protein signal transdu...	36
GO:0012501	programmed cell death	442	14	1.24	9.41842e-12			GO:0010243	response to organic nitrogen	422	16	1.67	5.64255e-12								GO:0050896	response to stimulus	5893	128	54.23	1.96659e-35								GO:0019748	secondary metabolic process	800	25	6.73	1.15441e-08								GO:0051056	regulation of small GTPase mediated sign...	36
GO:0014070	response to organic cyclic compound	835	18	2.34	3.19828e-12			GO:0010286	heat acclimation	81	3	0.32	0.00406099								GO:0072330	monocarboxylic acid biosynthetic process	606	51	5.58	2.14398e-35								GO:0009738	abscisic acid mediated signaling pathway	238	14	2	1.33192e-08								GO:0050896	response to stimulus	5893
GO:0015031	protein transport	1098	15	3.08	1.56596e-07			GO:0010363	regulation of plant-type hypersensitive ...	372	19	1.47	1.70769e-16								GO:0048585	negative regulation of response to stimu...	360	42	3.31	9.79908e-35								GO:0009595	detection of biotic stimulus	105	10	0.88	1.86352e-08								GO:0015698	inorganic anion transport	276
GO:0016044	cellular membrane organization	475	7	1.33	0.000327952			GO:0010583	response to cyclopentenone	146	6	0.58	2.39933e-05								GO:0009611	response to wounding	331	40	3.05	1.18855e-33								GO:0009814	defense response, incompatible interacti...	533	20	4.48	2.06462e-08								GO:0032879	regulation of localization	205
GO:0016053	organic acid biosynthetic process	1089	12	3.05	3.24083e-05			GO:0010941	regulation of cell death	400	19	1.58	6.49517e-16								GO:0035556	intracellular signal transduction	549	47	5.05	8.46408e-33								GO:0050832	defense response to fungus	334	16	2.81	2.14892e-08								GO:0097306	cellular response to alcohol	283
GO:0016265	death	485	14	1.36	3.24885e-11			GO:0012501	programmed cell death	442	19	1.75	4.0266e-15								GO:1901701	cellular response to oxygen-containing c...	882	55	8.12	1.47942e-31								GO:0071215	cellular response to abscisic acid stimu...	248	14	2.09	2.24264e-08								GO:0002684	positive regulation of immune system pro...	42
GO:0019438	aromatic compound biosynthetic process	3012	16	8.44	0.0059643			GO:0014070	response to organic cyclic compound	835	23	3.31	3.9315e-14								GO:0006605	protein targeting	887	55	8.16	1.97801e-31								GO:0009851	auxin biosynthetic process	111	10	0.93	3.19024e-08								GO:0050778	positive regulation of immune response	42
GO:0019748	secondary metabolic process	800	7	2.24	0.0064818			GO:0015031	protein transport	1098	22	4.35	8.91702e-11								GO:0071407	cellular response to organic cyclic comp...	525	45	4.83	2.3211e-31								GO:0009627	systemic acquired resistance	445	18	3.74	3.62091e-08								GO:0010583	response to cyclopentenone	146
GO:0019752	carboxylic acid metabolic process	1804	14	5.06	0.000285392			GO:0015711	organic anion transport	287	5	1.14	0.00554972								GO:0071495	cellular response to endogenous stimulus	735	50	6.76	3.06649e-30								GO:1901605	alpha-amino acid metabolic process	559	20	4.7	4.53509e-08								GO:0051336	regulation of hydrolase activity	43
GO:0023052	signaling	1738	22	4.87	1.97777e-10			GO:0015849	organic acid transport	274	5	1.09	0.00456989								GO:0009755	hormone-mediated signaling pathway	702	49	6.46	4.111e-30								GO:0071310	cellular response to organic substance	1124	29	9.45	4.61375e-08								GO:0044765	single-organism transport	2683
GO:0030968	endoplasmic reticulum unfolded protein r...	180	13	0.5	1.59548e-15			GO:0016044	cellular membrane organization	475	9	1.88	0.000100197								GO:0050794	regulation of cellular process	3924	102	36.11	5.31387e-30								GO:0019752	carboxylic acid metabolic process	1804	38	15.17	5.61112e-08								GO:0009751	response to salicylic acid stimulus	458
GO:0031347	regulation of defense response	535	19	1.5	7.55619e-17			GO:0016053	organic acid biosynthetic process	1089	16	4.31	3.72406e-06								GO:0015031	protein transport	1098	58	10.1	1.39893e-29								GO:0043436	oxoacid metabolic process	1816	38	15.27	6.68687e-08								GO:0031329	regulation of cellular catabolic process	46
GO:0031348	negative regulation of defense response	277	12	0.78	9.85214e-12			GO:0016265	death	485	19	1.92	2.16424e-14								GO:0045184	establishment of protein localization	1098	58	10.1	1.39893e-29								GO:0006082	organic acid metabolic process	1817	38	15.28	6.78479e-08								GO:0045087	innate immune response	852
GO:0032787	monocarboxylic acid metabolic process	1185	14	3.32	2.60142e-06			GO:0019748	secondary metabolic process	800	9	3.17	0.00410013								GO:0033036	macromolecule localization	1395	64	12.84	1.76814e-29								GO:1901607	alpha-amino acid biosynthetic process	419	17	3.52	8.56343e-08								GO:0006955	immune response	859
GO:0032870	cellular response to hormone stimulus	730	11	2.05	4.01203e-06			GO:0019752	carboxylic acid metabolic process	1804	19	7.15	4.65823e-05								GO:0032870	cellular response to hormone stimulus	730	49	6.72	2.50035e-29								GO:0031348	negative regulation of defense response	277	14	2.33	8.92776e-08								GO:0016044	cellular membrane organization	475
GO:0033036	macromolecule localization	1395	19	3.91	1.80775e-09			GO:0023052	signaling	1738	32	6.88	5.23972e-15								GO:0006886	intracellular protein transport	1001	55	9.21	9.30317e-29								GO:0014070	response to organic cyclic compound	835	24	7.02	1.13973e-07								GO:0061024	membrane organization	475
GO:0033037	polysaccharide localization	93	8	0.26	1.71259e-10			GO:0030968	endoplasmic reticulum unfolded protein r...	180	16	0.71	9.07325e-18								GO:0008104	protein localization	1155	58	10.63	2.02304e-28								GO:0097306	cellular response to alcohol	283	14	2.38	1.16305e-07								GO:0097305	response to alcohol	674
GO:0033554	cellular response to stress	1352	22	3.79	1.36949e-12			GO:0031347	regulation of defense response	535	25	2.12	7.54745e-21								GO:0034613	cellular protein localization	1019	55	9.38	2.2819e-28								GO:0042742	defense response to bacterium	385	16	3.24	1.52646e-07								GO:0009738	abscisic acid mediated signaling pathway	238
GO:0033993	response to lipid	761	7	2.13	0.00495242			GO:0031348	negative regulation of defense response	277	15	1.1	1.71703e-13								GO:0006944	cellular membrane fusion	240	32	2.21	3.04846e-28								GO:0009684	indoleacetic acid biosynthetic process	100	9	0.84	1.61045e-07								GO:0006862	nucleotide transport	53
GO:0034050	host programmed cell death induced by sy...	401	14	1.12	2.54603e-12			GO:0032787	monocarboxylic acid metabolic process	1185	18	4.69	4.78958e-07								GO:0061025	membrane fusion	240	32	2.21	3.04846e-28								GO:0007154	cell communication	2044	40	17.19	1.66445e-07								GO:0032313	regulation of Rab GTPase activity	17
GO:0034613	cellular protein localization	1019	14	2.86	4.27278e-07			GO:0032870	cellular response to hormone stimulus	730	17	2.89	2.18998e-09								GO:0048519	negative regulation of biological proces...	1138	57	10.47	8.06126e-28								GO:0009683	indoleacetic acid metabolic process	101	9	0.85	1.7555e-07								GO:0032482	Rab protein signal transduction	17
GO:0034620	cellular response to unfolded protein	182	13	0.51	1.8442e-15			GO:0033036	macromolecule localization	1395	27	5.53	5.91551e-13								GO:0046907	intracellular transport	1286	60	11.83	8.69327e-28								GO:0008652	cellular amino acid biosynthetic process	553	19	4.65	1.90749e-07								GO:0032483	regulation of Rab protein signal transdu...	17
GO:0034976	response to endoplasmic reticulum stress	348	14	0.98	3.72635e-13			GO:0033037	polysaccharide localization	93	11	0.37	7.3372e-14								GO:0070727	cellular macromolecule localization	1049	55	9.65	9.77836e-28								GO:0071396	cellular response to lipid	345	15	2.9	2.14958e-07								GO:0071215	cellular response to abscisic acid stimu...	248
GO:0035556	intracellular signal transduction	549	10	1.54	2.22768e-06			GO:0033554	cellular response to stress	1352	28	5.36	3.32026e-14								GO:0002679	respiratory burst involved in defense re...	121	25	1.11	3.99933e-27								GO:0009737	response to abscisic acid stimulus	570	19	4.79	3.03579e-07								GO:0009862	systemic acquired resistance, salicylic ...	251
GO:0035966	response to topologically incorrect prot...	359	15	1.01	2.603e-14			GO:0033993	response to lipid	761	13	3.01	7.27308e-06								GO:0045730	respiratory burst	121	25	1.11	3.99933e-27								GO:0048585	negative regulation of response to stimu...	360	15	3.03	3.70594e-07								GO:0006811	ion transport	1128
GO:0035967	cellular response to topologically incor...	182	13	0.51	1.8442e-15			GO:0034050	host programmed cell death induced by sy...	401	19	1.59	6.79969e-16								GO:0009753	response to jasmonic acid stimulus	462	39	4.25	8.34513e-27								GO:0009692	ethylene metabolic process	111	9	0.93	3.95701e-07								GO:0009894	regulation of catabolic process	58
GO:0036294	cellular response to decreased oxygen le...	23	2	0.06	0.00187331			GO:0034613	cellular protein localization	1019	21	4.04	1.6252e-10								GO:0050789	regulation of biological process	4569	105	42.04	1.42576e-26								GO:0009693	ethylene biosynthetic process	111	9	0.93	3.95701e-07								GO:0071396	cellular response to lipid	345
GO:0042221	response to chemical stimulus	3424	34	9.6	1.67902e-14			GO:0034620	cellular response to unfolded protein	182	16	0.72	1.08506e-17								GO:0014070	response to organic cyclic compound	835	48	7.68	1.07266e-25								GO:0043449	cellular alkene metabolic process	111	9	0.93	3.95701e-07								GO:0010584	pollen exine formation	20
GO:0042537	benzene-containing compound metabolic pr...	259	10	0.73	1.9949e-09			GO:0034976	response to endoplasmic reticulum stress	348	17	1.38	1.78301e-14								GO:0051649	establishment of localization in cell	1408	60	12.96	1.09578e-25								GO:0043450	alkene biosynthetic process	111	9	0.93	3.95701e-07								GO:0010167	response to nitrate	187
GO:0042538	hyperosmotic salinity response	156	4	0.44	0.000939988			GO:0035556	intracellular signal transduction	549	13	2.17	1.90228e-07								GO:0065007	biological regulation	4974	107	45.77	7.96459e-25								GO:1900673	olefin metabolic process	111	9	0.93	3.95701e-07								GO:0009863	salicylic acid mediated signaling pathwa...	351
GO:0043067	regulation of programmed cell death	393	14	1.1	1.93972e-12			GO:0035966	response to topologically incorrect prot...	359	18	1.42	1.6852e-15								GO:0071702	organic substance transport	1646	63	15.15	1.40993e-24								GO:1900674	olefin biosynthetic process	111	9	0.93	3.95701e-07								GO:0071446	cellular response to salicylic acid stim...	353
GO:0043069	negative regulation of programmed cell d...	170	8	0.48	2.09901e-08			GO:0035967	cellular response to topologically incor...	182	16	0.72	1.08506e-17								GO:0051641	cellular localization	1490	60	13.71	2.1521e-24								GO:0000162	tryptophan biosynthetic process	19	5	0.16	4.13643e-07								GO:0048523	negative regulation of cellular process	742
GO:0043436	oxoacid metabolic process	1816	14	5.09	0.000305872			GO:0036294	cellular response to decreased oxygen le...	23	2	0.09	0.00370436								GO:0016053	organic acid biosynthetic process	1089	52	10.02	3.39643e-24								GO:0046219	indolalkylamine biosynthetic process	19	5	0.16	4.13643e-07								GO:0007264	small GTPase mediated signal transductio...	124
GO:0043449	cellular alkene metabolic process	111	3	0.31	0.00370088			GO:0042221	response to chemical stimulus	3424	44	13.56	4.86594e-16								GO:0046394	carboxylic acid biosynthetic process	1089	52	10.02	3.39643e-24								GO:0051606	detection of stimulus	150	10	1.26	5.48536e-07								GO:0010208	pollen wall assembly	22
GO:0043450	alkene biosynthetic process	111	3	0.31	0.00370088			GO:0042537	benzene-containing compound metabolic pr...	259	11	1.03	5.16343e-09								GO:0009692	ethylene metabolic process	111	22	1.02	1.57737e-23								GO:0034754	cellular hormone metabolic process	151	10	1.27	5.83276e-07								GO:0010927	cellular component assembly involved in ...	22
GO:0044281	small molecule metabolic process	2933	16	8.22	0.00456307			GO:0042538	hyperosmotic salinity response	156	6	0.62	3.48555e-05								GO:0009693	ethylene biosynthetic process	111	22	1.02	1.57737e-23								GO:0009611	response to wounding	331	14	2.78	7.77123e-07								GO:0070887	cellular response to chemical stimulus	1299
GO:0044283	small molecule biosynthetic process	1565	14	4.39	6.20986e-05			GO:0043067	regulation of programmed cell death	393	19	1.56	4.69646e-16								GO:0043449	cellular alkene metabolic process	111	22	1.02	1.57737e-23								GO:0002679	respiratory burst involved in defense re...	121	9	1.02	8.24123e-07								GO:0031348	negative regulation of defense response	277
GO:0044699	single-organism process	7960	33	22.31	0.00116931			GO:0043069	negative regulation of programmed cell d...	170	12	0.67	2.58647e-12								GO:0043450	alkene biosynthetic process	111	22	1.02	1.57737e-23								GO:0045730	respiratory burst	121	9	1.02	8.24123e-07								GO:1901698	response to nitrogen compound	753
GO:0044700	single organism signaling	1737	22	4.87	1.95576e-10			GO:0043436	oxoacid metabolic process	1816	19	7.19	5.10461e-05								GO:1900673	olefin metabolic process	111	22	1.02	1.57737e-23								GO:0006568	tryptophan metabolic process	90	8	0.76	8.85386e-07								GO:0009725	response to hormone stimulus	1422
GO:0044710	single-organism metabolic process	4377	25	12.27	6.29053e-05			GO:0043449	cellular alkene metabolic process	111	5	0.44	7.73395e-05								GO:1900674	olefin biosynthetic process	111	22	1.02	1.57737e-23								GO:0006586	indolalkylamine metabolic process	90	8	0.76	8.85386e-07								GO:0002376	immune system process	969
GO:0044711	single-organism biosynthetic process	1713	14	4.8	0.000165169			GO:0043450	alkene biosynthetic process	111	5	0.44	7.73395e-05								GO:0009738	abscisic acid mediated signaling pathway	238	28	2.19	3.26115e-23								GO:0097305	response to alcohol	674	20	5.67	9.02747e-07
GO:0044763	single-organism cellular process	6499	31	18.22	0.00012518			GO:0044281	small molecule metabolic process	2933	22	11.62	0.00145236								GO:0048523	negative regulation of cellular process	742	43	6.83	4.91789e-23								GO:0043900	regulation of multi-organism process	124	9	1.04	1.01336e-06
GO:0044765	single-organism transport	2683	16	7.52	0.00179754			GO:0044283	small molecule biosynthetic process	1565	18	6.2	2.44431e-05								GO:0009612	response to mechanical stimulus	60	18	0.55	5.25869e-23								GO:0033993	response to lipid	761	21	6.4	1.50464e-06
GO:0045087	innate immune response	852	20	2.39	2.53387e-14			GO:0044699	single-organism process	7960	47	31.53	8.12251e-05								GO:0071215	cellular response to abscisic acid stimu...	248	28	2.28	1.02809e-22								GO:0010120	camalexin biosynthetic process	11	4	0.09	1.50937e-06
GO:0045088	regulation of innate immune response	416	15	1.17	2.2313e-13			GO:0044700	single organism signaling	1737	32	6.88	5.1544e-15								GO:0009862	systemic acquired resistance, salicylic ...	251	28	2.31	1.43618e-22								GO:0052317	camalexin metabolic process	11	4	0.09	1.50937e-06
GO:0045184	establishment of protein localization	1098	15	3.08	1.56596e-07			GO:0044710	single-organism metabolic process	4377	33	17.34	2.92167e-05								GO:0032787	monocarboxylic acid metabolic process	1185	52	10.9	1.65299e-22								GO:0009751	response to salicylic acid stimulus	458	16	3.85	1.53771e-06
GO:0045730	respiratory burst	121	5	0.34	2.15916e-05			GO:0044711	single-organism biosynthetic process	1713	18	6.79	8.10647e-05								GO:0009867	jasmonic acid mediated signaling pathway	283	29	2.6	2.64184e-22								GO:0009863	salicylic acid mediated signaling pathwa...	351	14	2.95	1.55688e-06
GO:0046394	carboxylic acid biosynthetic process	1089	12	3.05	3.24083e-05			GO:0044763	single-organism cellular process	6499	45	25.74	1.23526e-06								GO:0071395	cellular response to jasmonic acid stimu...	283	29	2.6	2.64184e-22								GO:0071446	cellular response to salicylic acid stim...	353	14	2.97	1.66442e-06
GO:0046907	intracellular transport	1286	14	3.6	6.76549e-06			GO:0044765	single-organism transport	2683	25	10.63	1.52039e-05								GO:0097306	cellular response to alcohol	283	29	2.6	2.64184e-22								GO:0044700	single organism signaling	1737	34	14.61	1.88371e-06
GO:0048519	negative regulation of biological proces...	1138	16	3.19	3.5083e-08			GO:0045087	innate immune response	852	25	3.37	4.86385e-16								GO:0009725	response to hormone stimulus	1422	55	13.08	2.61823e-21								GO:0023052	signaling	1738	34	14.62	1.90831e-06
GO:0048523	negative regulation of cellular process	742	9	2.08	0.000183951			GO:0045088	regulation of innate immune response	416	20	1.65	7.59634e-17								GO:0044283	small molecule biosynthetic process	1565	57	14.4	6.73865e-21								GO:0009700	indole phytoalexin biosynthetic process	12	4	0.1	2.24928e-06
GO:0048583	regulation of response to stimulus	720	20	2.02	1.03284e-15			GO:0045184	establishment of protein localization	1098	22	4.35	8.91702e-11								GO:0002252	immune effector process	274	27	2.52	2.37612e-20								GO:0046217	indole phytoalexin metabolic process	12	4	0.1	2.24928e-06
GO:0048585	negative regulation of response to stimu...	360	12	1.01	2.05992e-10			GO:0045730	respiratory burst	121	6	0.48	8.21609e-06								GO:0016044	cellular membrane organization	475	33	4.37	5.19457e-20								GO:0052314	phytoalexin metabolic process	12	4	0.1	2.24928e-06
GO:0050776	regulation of immune response	418	15	1.17	2.39203e-13			GO:0046394	carboxylic acid biosynthetic process	1089	16	4.31	3.72406e-06								GO:0061024	membrane organization	475	33	4.37	5.19457e-20								GO:0052315	phytoalexin biosynthetic process	12	4	0.1	2.24928e-06
GO:0050789	regulation of biological process	4569	26	12.81	4.04333e-05			GO:0046907	intracellular transport	1286	21	5.09	1.08641e-08								GO:0071396	cellular response to lipid	345	29	3.17	6.89896e-20								GO:0007165	signal transduction	1675	33	14.09	2.42013e-06
GO:0050794	regulation of cellular process	3924	25	11	8.39902e-06			GO:0046942	carboxylic acid transport	274	5	1.09	0.00456989								GO:0000165	MAPK cascade	222	24	2.04	4.13216e-19								GO:0000165	MAPK cascade	222	11	1.87	2.77131e-06
GO:0050832	defense response to fungus	334	12	0.94	8.68556e-11			GO:0048519	negative regulation of biological proces...	1138	23	4.51	2.40646e-11								GO:0009723	response to ethylene stimulus	337	28	3.1	4.39515e-19								GO:0007243	intracellular protein kinase cascade	223	11	1.88	2.89442e-06
GO:0050896	response to stimulus	5893	41	16.52	8.53035e-14			GO:0048523	negative regulation of cellular process	742	14	2.94	9.4288e-07								GO:0007243	intracellular protein kinase cascade	223	24	2.05	4.59575e-19								GO:0006520	cellular amino acid metabolic process	805	21	6.77	3.64771e-06
GO:0051179	localization	3261	23	9.14	4.58623e-06			GO:0048583	regulation of response to stimulus	720	27	2.85	4.05978e-20								GO:0044711	single-organism biosynthetic process	1713	57	15.76	5.05424e-19								GO:0010310	regulation of hydrogen peroxide metaboli...	186	10	1.56	3.87692e-06
GO:0051234	establishment of localization	3085	19	8.65	0.000340932			GO:0048585	negative regulation of response to stimu...	360	16	1.43	5.04288e-13								GO:0009617	response to bacterium	548	33	5.04	4.01216e-18								GO:1901566	organonitrogen compound biosynthetic pro...	1090	25	9.17	3.89379e-06
GO:0051641	cellular localization	1490	16	4.18	1.40205e-06			GO:0050776	regulation of immune response	418	20	1.66	8.33529e-17								GO:0044765	single-organism transport	2683	68	24.69	9.17457e-17								GO:0042445	hormone metabolic process	290	12	2.44	6.20866e-06
GO:0051649	establishment of localization in cell	1408	16	3.95	6.56927e-07			GO:0050789	regulation of biological process	4569	38	18.1	2.18505e-07								GO:0051179	localization	3261	75	30.01	1.88648e-16								GO:0009414	response to water deprivation	396	14	3.33	6.30087e-06
GO:0051704	multi-organism process	1572	19	4.41	1.31304e-08			GO:0050794	regulation of cellular process	3924	37	15.54	1.14412e-08								GO:0044763	single-organism cellular process	6499	109	59.8	3.74653e-16								GO:0009415	response to water stimulus	402	14	3.38	7.47764e-06
GO:0051707	response to other organism	1349	18	3.78	7.98316e-09			GO:0050832	defense response to fungus	334	16	1.32	1.59396e-13								GO:0009737	response to abscisic acid stimulus	570	31	5.24	8.31368e-16								GO:0034976	response to endoplasmic reticulum stress	348	13	2.93	7.62543e-06
GO:0051716	cellular response to stimulus	2727	26	7.64	8.75912e-10			GO:0050896	response to stimulus	5893	53	23.34	5.25423e-14								GO:0006810	transport	3008	70	27.68	2.29982e-15								GO:2000377	regulation of reactive oxygen species me...	201	10	1.69	7.71137e-06
GO:0052542	defense response by callose deposition	63	8	0.18	6.92911e-12			GO:0051179	localization	3261	34	12.92	5.73177e-09								GO:0019752	carboxylic acid metabolic process	1804	53	16.6	3.04918e-15								GO:0009404	toxin metabolic process	204	10	1.72	8.78399e-06
GO:0052545	callose localization	92	8	0.26	1.56851e-10			GO:0051234	establishment of localization	3085	29	12.22	1.61293e-06								GO:0043436	oxoacid metabolic process	1816	53	16.71	4.02571e-15								GO:0009407	toxin catabolic process	204	10	1.72	8.78399e-06
GO:0060548	negative regulation of cell death	174	8	0.49	2.51718e-08			GO:0051641	cellular localization	1490	24	5.9	8.39564e-10								GO:0006082	organic acid metabolic process	1817	53	16.72	4.11954e-15								GO:0009862	systemic acquired resistance, salicylic ...	251	11	2.11	8.96015e-06
GO:0061024	membrane organization	475	7	1.33	0.000327952			GO:0051649	establishment of localization in cell	1408	24	5.58	2.64291e-10								GO:0051234	establishment of localization	3085	70	28.39	8.71477e-15								GO:0042446	hormone biosynthetic process	251	11	2.11	8.96015e-06
GO:0061025	membrane fusion	240	6	0.67	5.27755e-05			GO:0051704	multi-organism process	1572	26	6.23	6.66554e-11								GO:0097305	response to alcohol	674	32	6.2	1.22037e-14								GO:0010817	regulation of hormone levels	410	14	3.45	9.34855e-06
GO:0065007	biological regulation	4974	26	13.94	0.000193388			GO:0051707	response to other organism	1349	25	5.34	1.56499e-11								GO:0042742	defense response to bacterium	385	24	3.54	1.15202e-13								GO:0009628	response to abiotic stimulus	2574	42	21.65	9.52023e-06
GO:0070727	cellular macromolecule localization	1049	14	2.94	6.0713e-07			GO:0051716	cellular response to stimulus	2727	36	10.8	1.16037e-12								GO:0033993	response to lipid	761	32	7	3.42299e-13								GO:0006576	cellular biogenic amine metabolic proces...	163	9	1.37	9.68611e-06
GO:0070887	cellular response to chemical stimulus	1299	24	3.64	4.30961e-15			GO:0052542	defense response by callose deposition	63	11	0.25	8.11662e-16								GO:0052542	defense response by callose deposition	63	12	0.58	4.22241e-13								GO:0044550	secondary metabolite biosynthetic proces...	470	15	3.95	9.90303e-06
GO:0071215	cellular response to abscisic acid stimu...	248	6	0.7	6.33115e-05			GO:0052545	callose localization	92	11	0.36	6.489e-14								GO:0009595	detection of biotic stimulus	105	14	0.97	7.5781e-13								GO:0001666	response to hypoxia	89	7	0.75	9.90674e-06
GO:0071310	cellular response to organic substance	1124	22	3.15	3.20288e-14			GO:0060548	negative regulation of cell death	174	12	0.69	3.40994e-12								GO:0052545	callose localization	92	13	0.85	2.4047e-12								GO:0036293	response to decreased oxygen levels	92	7	0.77	1.2335e-05
GO:0071395	cellular response to jasmonic acid stimu...	283	10	0.79	4.68068e-09			GO:0061024	membrane organization	475	9	1.88	0.000100197								GO:0033037	polysaccharide localization	93	13	0.86	2.77359e-12								GO:0070482	response to oxygen levels	92	7	0.77	1.2335e-05
GO:0071396	cellular response to lipid	345	6	0.97	0.000380956			GO:0061025	membrane fusion	240	6	0.95	0.000369324								GO:0009873	ethylene mediated signaling pathway	116	14	1.07	3.06725e-12								GO:0009581	detection of external stimulus	62	6	0.52	1.3243e-05
GO:0071407	cellular response to organic cyclic comp...	525	14	1.47	9.27799e-11			GO:0065007	biological regulation	4974	38	19.7	2.27703e-06								GO:0009987	cellular process	11046	137	101.64	9.32868e-12								GO:0009808	lignin metabolic process	63	6	0.53	1.45366e-05
GO:0071446	cellular response to salicylic acid stim...	353	14	0.99	4.52529e-13			GO:0070727	cellular macromolecule localization	1049	21	4.16	2.77226e-10								GO:0044699	single-organism process	7960	114	73.25	9.40923e-12								GO:0044106	cellular amine metabolic process	172	9	1.45	1.49195e-05
GO:0071453	cellular response to oxygen levels	23	2	0.06	0.00187331			GO:0070887	cellular response to chemical stimulus	1299	33	5.15	9.12633e-20								GO:0071369	cellular response to ethylene stimulus	131	14	1.21	1.64871e-11								GO:0032787	monocarboxylic acid metabolic process	1185	25	9.97	1.65431e-05
GO:0071456	cellular response to hypoxia	21	2	0.06	0.00156048			GO:0071215	cellular response to abscisic acid stimu...	248	11	0.98	3.28067e-09								GO:0044710	single-organism metabolic process	4377	78	40.28	5.10137e-11								GO:0009651	response to salt stress	750	19	6.31	1.67899e-05
GO:0071495	cellular response to endogenous stimulus	735	11	2.06	4.28369e-06			GO:0071310	cellular response to organic substance	1124	31	4.45	1.90944e-19								GO:0044281	small molecule metabolic process	2933	61	26.99	6.37721e-11								GO:0042401	cellular biogenic amine biosynthetic pro...	40	5	0.34	2.03116e-05
GO:0071702	organic substance transport	1646	16	4.61	5.19254e-06			GO:0071395	cellular response to jasmonic acid stimu...	283	12	1.12	9.79007e-10								GO:0000160	phosphorelay signal transduction system	147	14	1.35	7.91388e-11								GO:0048519	negative regulation of biological proces...	1138	24	9.57	2.5238e-05
GO:0072330	monocarboxylic acid biosynthetic process	606	12	1.7	7.108e-08			GO:0071396	cellular response to lipid	345	11	1.37	9.82164e-08								GO:0051606	detection of stimulus	150	14	1.38	1.03926e-10								GO:0042743	hydrogen peroxide metabolic process	334	12	2.81	2.54831e-05
GO:0080134	regulation of response to stress	554	19	1.55	1.43826e-16			GO:0071407	cellular response to organic cyclic comp...	525	19	2.08	8.98771e-14								GO:0043900	regulation of multi-organism process	124	13	1.14	1.14915e-10								GO:0071456	cellular response to hypoxia	21	4	0.18	2.56418e-05
GO:0080135	regulation of cellular response to stres...	382	14	1.07	1.32141e-12			GO:0071446	cellular response to salicylic acid stim...	353	19	1.4	6.47306e-17								GO:0010310	regulation of hydrogen peroxide metaboli...	186	15	1.71	1.74592e-10								GO:0009809	lignin biosynthetic process	42	5	0.35	2.59069e-05
GO:0097305	response to alcohol	674	7	1.89	0.00253326			GO:0071453	cellular response to oxygen levels	23	2	0.09	0.00370436								GO:0042538	hyperosmotic salinity response	156	14	1.44	1.75997e-10								GO:0006569	tryptophan catabolic process	73	6	0.61	3.39988e-05
GO:0097306	cellular response to alcohol	283	6	0.79	0.000130897			GO:0071456	cellular response to hypoxia	21	2	0.08	0.00309048								GO:0019438	aromatic compound biosynthetic process	3012	61	27.72	1.95804e-10								GO:0046218	indolalkylamine catabolic process	73	6	0.61	3.39988e-05
GO:1900673	olefin metabolic process	111	3	0.31	0.00370088			GO:0071495	cellular response to endogenous stimulus	735	17	2.91	2.42755e-09								GO:0044249	cellular biosynthetic process	5725	90	52.68	4.36671e-10								GO:0036294	cellular response to decreased oxygen le...	23	4	0.19	3.74456e-05
GO:1900674	olefin biosynthetic process	111	3	0.31	0.00370088			GO:0071702	organic substance transport	1646	25	6.52	1.10411e-09								GO:0009409	response to cold	572	24	5.26	4.72289e-10								GO:0071453	cellular response to oxygen levels	23	4	0.19	3.74456e-05
GO:1901698	response to nitrogen compound	753	14	2.11	9.93901e-09			GO:0072330	monocarboxylic acid biosynthetic process	606	15	2.4	1.02157e-08								GO:2000377	regulation of reactive oxygen species me...	201	15	1.85	5.19351e-10								GO:0006970	response to osmotic stress	797	19	6.7	3.86808e-05
GO:1901700	response to oxygen-containing compound	2228	29	6.25	1.00104e-14			GO:0080134	regulation of response to stress	554	25	2.19	1.75933e-20								GO:1901576	organic substance biosynthetic process	5892	91	54.22	8.48441e-10								GO:0042436	indole-containing compound catabolic pro...	75	6	0.63	3.96668e-05
GO:1901701	cellular response to oxygen-containing c...	882	17	2.47	8.96417e-11			GO:0080135	regulation of cellular response to stres...	382	19	1.51	2.78543e-16								GO:1901362	organic cyclic compound biosynthetic pro...	3246	62	29.87	1.46081e-09								GO:0042402	cellular biogenic amine catabolic proces...	111	7	0.93	4.18903e-05
GO:2000377	regulation of reactive oxygen species me...	201	4	0.56	0.00238456			GO:0097305	response to alcohol	674	13	2.67	1.92776e-06								GO:0009625	response to insect	75	10	0.69	1.6023e-09								GO:0006972	hyperosmotic response	249	10	2.09	4.87991e-05
								GO:0097306	cellular response to alcohol	283	11	1.12	1.29579e-08								GO:0009058	biosynthetic process	6089	92	56.03	2.14372e-09								GO:0009310	amine catabolic process	114	7	0.96	4.97008e-05
								GO:1900673	olefin metabolic process	111	5	0.44	7.73395e-05								GO:0009695	jasmonic acid biosynthetic process	131	12	1.21	2.94167e-09								GO:0042538	hyperosmotic salinity response	156	8	1.31	5.20353e-05
								GO:1900674	olefin biosynthetic process	111	5	0.44	7.73395e-05								GO:0009694	jasmonic acid metabolic process	154	12	1.42	1.85193e-08								GO:0009074	aromatic amino acid family catabolic pro...	79	6	0.66	5.32725e-05
								GO:1901264	carbohydrate derivative transport	36	2	0.14	0.00892424								GO:0002237	response to molecule of bacterial origin	99	10	0.91	2.49499e-08								GO:0072593	reactive oxygen species metabolic proces...	364	12	3.06	5.87271e-05
								GO:1901698	response to nitrogen compound	753	16	2.98	2.59722e-08								GO:0006972	hyperosmotic response	249	14	2.29	7.42253e-08								GO:1901606	alpha-amino acid catabolic process	166	8	1.4	8.06331e-05
								GO:1901700	response to oxygen-containing compound	2228	37	8.83	2.50076e-16								GO:0009628	response to abiotic stimulus	2574	50	23.69	7.86809e-08								GO:0033036	macromolecule localization	1395	26	11.73	9.00022e-05
								GO:1901701	cellular response to oxygen-containing c...	882	24	3.49	1.20298e-14								GO:0009605	response to external stimulus	700	23	6.44	1.07878e-07								GO:0043069	negative regulation of programmed cell d...	170	8	1.43	9.52405e-05
								GO:2000377	regulation of reactive oxygen species me...	201	4	0.8	0.00826484								GO:0009266	response to temperature stimulus	880	26	8.1	1.18865e-07								GO:0065007	biological regulation	4974	63	41.83	9.89565e-05
																					GO:0009963	positive regulation of flavonoid biosynt...	103	9	0.95	4.4762e-07								GO:0044281	small molecule metabolic process	2933	43	24.67	0.000100211
																					GO:0042743	hydrogen peroxide metabolic process	334	15	3.07	4.61516e-07								GO:0009063	cellular amino acid catabolic process	173	8	1.45	0.00010758
																					GO:0043090	amino acid import	76	8	0.7	4.74062e-07								GO:0060548	negative regulation of cell death	174	8	1.46	0.000111976
																					GO:1900378	positive regulation of secondary metabol...	104	9	0.96	4.86218e-07								GO:0009695	jasmonic acid biosynthetic process	131	7	1.1	0.000119763
																					GO:0010565	regulation of cellular ketone metabolic ...	173	11	1.59	5.83173e-07								GO:0071407	cellular response to organic cyclic comp...	525	14	4.41	0.000137713
																					GO:0009414	response to water deprivation	396	16	3.64	7.69103e-07								GO:0044272	sulfur compound biosynthetic process	479	13	4.03	0.00020288
																					GO:0009415	response to water stimulus	402	16	3.7	9.37618e-07								GO:0009699	phenylpropanoid biosynthetic process	299	10	2.51	0.000220058
																					GO:0072593	reactive oxygen species metabolic proces...	364	15	3.35	1.36035e-06								GO:0010583	response to cyclopentenone	146	7	1.23	0.000234428
																					GO:0009962	regulation of flavonoid biosynthetic pro...	119	9	1.1	1.52274e-06								GO:0009308	amine metabolic process	367	11	3.09	0.000275109
																					GO:0010566	regulation of ketone biosynthetic proces...	119	9	1.1	1.52274e-06								GO:0016045	detection of bacterium	16	3	0.13	0.000300752
																					GO:1900376	regulation of secondary metabolite biosy...	128	9	1.18	2.79774e-06								GO:0009698	phenylpropanoid metabolic process	371	11	3.12	0.000301756
																					GO:0006865	amino acid transport	252	12	2.32	3.75864e-06								GO:0009694	jasmonic acid metabolic process	154	7	1.3	0.000324643
																					GO:0015748	organophosphate ester transport	72	7	0.66	4.33925e-06								GO:0016054	organic acid catabolic process	389	11	3.27	0.000450254
																					GO:0015696	ammonium transport	29	5	0.27	6.13429e-06								GO:0046395	carboxylic acid catabolic process	389	11	3.27	0.000450254
																					GO:0015802	basic amino acid transport	29	5	0.27	6.13429e-06								GO:0009069	serine family amino acid metabolic proce...	269	9	2.26	0.000454927
																					GO:2000762	regulation of phenylpropanoid metabolic ...	143	9	1.32	6.95922e-06								GO:0006605	protein targeting	887	18	7.46	0.000459831
																					GO:0015849	organic acid transport	274	12	2.52	8.82162e-06								GO:0002252	immune effector process	274	9	2.3	0.000519644
																					GO:0046942	carboxylic acid transport	274	12	2.52	8.82162e-06								GO:0009070	serine family amino acid biosynthetic pr...	221	8	1.86	0.000565044
																					GO:0015711	organic anion transport	287	12	2.64	1.40485e-05								GO:0009682	induced systemic resistance	21	3	0.18	0.000692636
																					GO:0044237	cellular metabolic process	8982	108	82.65	1.58171e-05								GO:0009072	aromatic amino acid family metabolic pro...	230	8	1.93	0.000733881
																					GO:0043455	regulation of secondary metabolic proces...	159	9	1.46	1.63846e-05								GO:0006790	sulfur compound metabolic process	553	13	4.65	0.000791777
																					GO:0006464	cellular protein modification process	2397	42	22.06	1.83055e-05								GO:1901564	organonitrogen compound metabolic proces...	1692	27	14.23	0.000793607
																					GO:0036211	protein modification process	2397	42	22.06	1.83055e-05								GO:0009605	response to external stimulus	700	15	5.89	0.000812556
																					GO:0042180	cellular ketone metabolic process	300	12	2.76	2.18065e-05								GO:0044282	small molecule catabolic process	420	11	3.53	0.000848637
																					GO:0006468	protein phosphorylation	981	23	9.03	3.17298e-05								GO:0044712	single-organism catabolic process	420	11	3.53	0.000848637
																					GO:0071456	cellular response to hypoxia	21	4	0.19	3.65006e-05								GO:0009073	aromatic amino acid family biosynthetic ...	94	5	0.79	0.00117904
																					GO:0048193	Golgi vesicle transport	318	12	2.93	3.85824e-05								GO:0009309	amine biosynthetic process	140	6	1.18	0.00118415
																					GO:0071704	organic substance metabolic process	9359	110	86.12	3.90886e-05								GO:0008152	metabolic process	10327	104	86.84	0.00124169
																					GO:0006888	ER to Golgi vesicle-mediated transport	104	7	0.96	4.8967e-05								GO:0070727	cellular macromolecule localization	1049	19	8.82	0.00124986
																					GO:0036294	cellular response to decreased oxygen le...	23	4	0.21	5.32358e-05								GO:0006564	L-serine biosynthetic process	7	2	0.06	0.00143421
																					GO:0071453	cellular response to oxygen levels	23	4	0.21	5.32358e-05								GO:0007568	aging	148	6	1.24	0.00157435
																					GO:0009651	response to salt stress	750	19	6.9	5.98376e-05								GO:0006886	intracellular protein transport	1001	18	8.42	0.00183023
																					GO:0042181	ketone biosynthetic process	243	10	2.24	8.51178e-05								GO:0009697	salicylic acid biosynthetic process	209	7	1.76	0.00195161
																					GO:0016310	phosphorylation	1065	23	9.8	0.000111133								GO:0034613	cellular protein localization	1019	18	8.57	0.00222373
																					GO:0009813	flavonoid biosynthetic process	206	9	1.9	0.000123344								GO:0050789	regulation of biological process	4569	54	38.42	0.00259953
																					GO:0006862	nucleotide transport	53	5	0.49	0.000124114								GO:0009696	salicylic acid metabolic process	222	7	1.87	0.00273832
																					GO:0006970	response to osmotic stress	797	19	7.33	0.000133032								GO:0065008	regulation of biological quality	1042	18	8.76	0.00282838
																					GO:0016192	vesicle-mediated transport	538	15	4.95	0.000133514								GO:0044248	cellular catabolic process	1485	23	12.49	0.00298939
																					GO:0015914	phospholipid transport	12	3	0.11	0.000158103								GO:0015031	protein transport	1098	18	9.23	0.00489709
																					GO:0006470	protein dephosphorylation	213	9	1.96	0.000158739								GO:0045184	establishment of protein localization	1098	18	9.23	0.00489709
																					GO:0008152	metabolic process	10327	116	95.03	0.000174716								GO:0006984	ER-nucleus signaling pathway	188	6	1.58	0.00515207
																					GO:0009646	response to absence of light	32	4	0.29	0.000202713								GO:0009817	defense response to fungus, incompatible...	42	3	0.35	0.00525694
																					GO:0043412	macromolecule modification	2745	43	25.26	0.000203284								GO:0010112	regulation of systemic acquired resistan...	14	2	0.12	0.00597966
																					GO:0009812	flavonoid metabolic process	230	9	2.12	0.000281246								GO:0042537	benzene-containing compound metabolic pr...	259	7	2.18	0.00633111
																					GO:0006725	cellular aromatic compound metabolic pro...	4704	63	43.28	0.000382653								GO:0010035	response to inorganic substance	1323	20	11.13	0.00737899
																					GO:0016311	dephosphorylation	243	9	2.24	0.000420664								GO:1901565	organonitrogen compound catabolic proces...	407	9	3.42	0.00751122
																					GO:0043543	protein acylation	432	12	3.98	0.00065884								GO:0018871	1-aminocyclopropane-1-carboxylate metabo...	16	2	0.13	0.00779907
																					GO:1901360	organic cyclic compound metabolic proces...	4916	64	45.24	0.000759091								GO:0042218	1-aminocyclopropane-1-carboxylate biosyn...	16	2	0.13	0.00779907
																					GO:0006796	phosphate-containing compound metabolic ...	2336	36	21.5	0.00106775								GO:0052482	defense response by cell wall thickening	16	2	0.13	0.00779907
																					GO:0048518	positive regulation of biological proces...	887	18	8.16	0.00133747								GO:0052544	defense response by callose deposition i...	16	2	0.13	0.00779907
																					GO:0006498	N-terminal protein lipidation	406	11	3.74	0.0013491								GO:0008104	protein localization	1155	18	9.71	0.00815271
																					GO:0006499	N-terminal protein myristoylation	406	11	3.74	0.0013491								GO:0044763	single-organism cellular process	6499	69	54.65	0.00822187
																					GO:0018377	protein myristoylation	406	11	3.74	0.0013491								GO:0000096	sulfur amino acid metabolic process	343	8	2.88	0.00851352
																					GO:0031365	N-terminal protein amino acid modificati...	410	11	3.77	0.00145848								GO:0019344	cysteine biosynthetic process	210	6	1.77	0.00869735
																					GO:0035304	regulation of protein dephosphorylation	136	6	1.25	0.00161866								GO:0006534	cysteine metabolic process	213	6	1.79	0.00928948
																					GO:0006497	protein lipidation	418	11	3.85	0.00169914								GO:0009987	cellular process	11046	106	92.89	0.00932598
																					GO:0042157	lipoprotein metabolic process	418	11	3.85	0.00169914
																					GO:0042158	lipoprotein biosynthetic process	418	11	3.85	0.00169914
																					GO:0006793	phosphorus metabolic process	2406	36	22.14	0.00181168
																					GO:0009699	phenylpropanoid biosynthetic process	299	9	2.75	0.00181389
																					GO:0035303	regulation of dephosphorylation	140	6	1.29	0.00187544
																					GO:0009733	response to auxin stimulus	361	10	3.32	0.00189102
																					GO:0031325	positive regulation of cellular metaboli...	560	13	5.15	0.00202093
																					GO:0009893	positive regulation of metabolic process	565	13	5.2	0.00218393
																					GO:0010035	response to inorganic substance	1323	23	12.17	0.00225305
																					GO:0002831	regulation of response to biotic stimulu...	29	3	0.27	0.00234164
																					GO:0070588	calcium ion transmembrane transport	9	2	0.08	0.00290242
																					GO:0002218	activation of innate immune response	32	3	0.29	0.00311522
																					GO:0002253	activation of immune response	32	3	0.29	0.00311522
																					GO:0010337	regulation of salicylic acid metabolic p...	10	2	0.09	0.00360617
																					GO:0051865	protein autoubiquitination	10	2	0.09	0.00360617
																					GO:0009816	defense response to bacterium, incompati...	34	3	0.31	0.0037083
																					GO:0010193	response to ozone	35	3	0.32	0.00402887
																					GO:0031323	regulation of cellular metabolic process	2362	34	21.73	0.00467194
																					GO:0006820	anion transport	563	12	5.18	0.00588156
																					GO:0045089	positive regulation of innate immune res...	40	3	0.37	0.00588166
																					GO:0048522	positive regulation of cellular process	793	15	7.3	0.00643521
																					GO:0010286	heat acclimation	81	4	0.75	0.00662487
																					GO:0002684	positive regulation of immune system pro...	42	3	0.39	0.00674345
																					GO:0050778	positive regulation of immune response	42	3	0.39	0.00674345
																					GO:0016043	cellular component organization	2890	39	26.59	0.00709355
																					GO:0006979	response to oxidative stress	578	12	5.32	0.00719453
																					GO:0009698	phenylpropanoid metabolic process	371	9	3.41	0.00743519
																					GO:0048584	positive regulation of response to stimu...	84	4	0.77	0.00752251
																					GO:0006811	ion transport	1128	19	10.38	0.0076617
																					GO:0009870	defense response signaling pathway, resi...	15	2	0.14	0.00816454
																					GO:0031349	positive regulation of defense response	45	3	0.41	0.0081701
																					GO:0001666	response to hypoxia	89	4	0.82	0.00919023
																					GO:0015931	nucleobase-containing compound transport	139	5	1.28	0.00926425
																					GO:0046777	protein autophosphorylation	139	5	1.28	0.00926425
																					GO:0009642	response to light intensity	257	7	2.36	0.0097606
[truncated: 21 more columns]
